# Supplementary material for: Bioinformatics profiling integrating a four immune-related long non-coding RNAs signature as a prognostic model for papillary renal cell carcinoma
Source: publisher site journal article supplement (doi:10.18632/aging.103580), 2020-07-27
Supplement: Supplementary file [file aging-v12i15-103580-supplementary-material-SD1.pdf]

SUPPLEMENTARY FIGURE

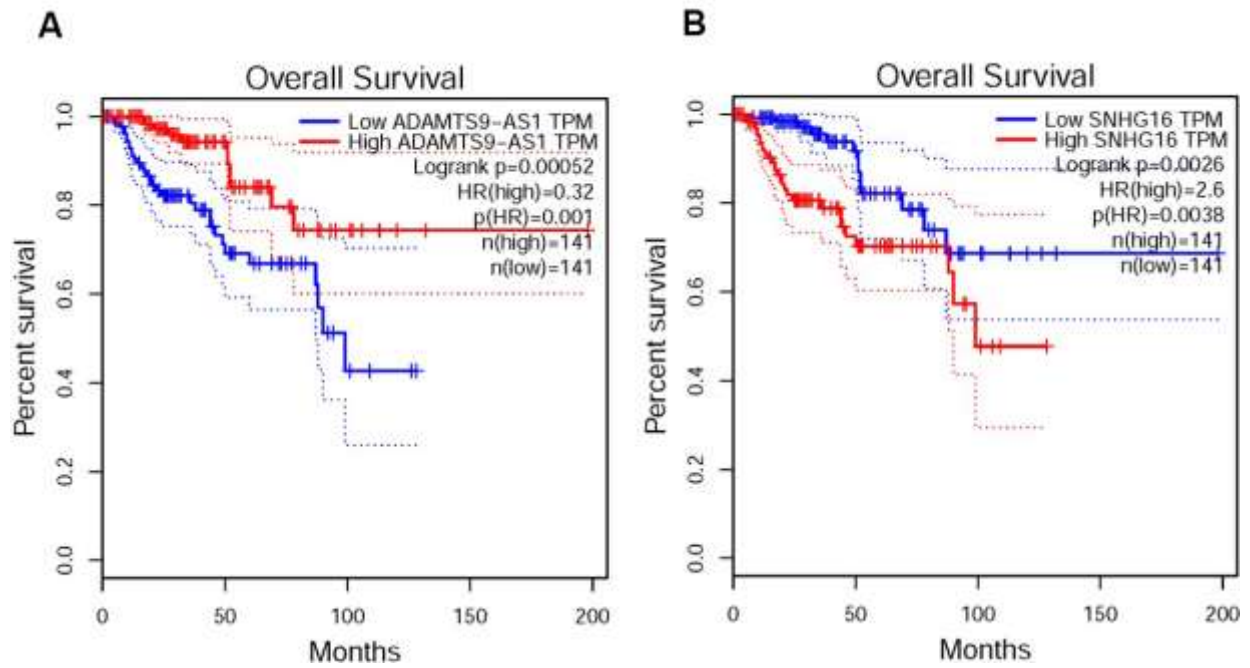

Supplementary Figure 1. The survival curve of ADAMTS9-AS1 (A) and SNHG16 (B) in pRCC patients.
